# Supplementary material
Source: PubMed Central journal article supplement (PMC3984330)
Supplement: mabs-6-409-s01.pdf [file mabs-6-409-s01.pdf]

**Supplemental Material to:**

**Stefanie Derer, Pia Glorius, Martin Schlaeth,  
Stefan Lohse, Katja Klausz, Umesh Muchhal,  
John R Desjarlais, Andreas Humpe, Thomas  
Valerius, and Matthias Peipp**

**Increasing FcγRIIa affinity of an FcγRIII-optimized anti-  
EGFR antibody restores neu-trophil-mediated cytotoxicity**

**2013; mAbs 6(2)**

**<http://dx.doi.org/10.4161/mabs.27435>**

**<https://www.landesbioscience.com/journals/mabs/article/27435/>**

## Supplementary data

### Supplementary Figure 1

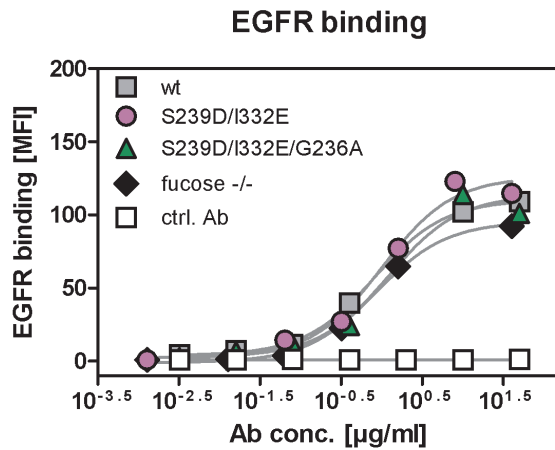

**Suppl. Figure 1. All Fc-engineered Ab variants demonstrate similar binding to EGFR.**

For indirect immunofluorescence, A431 cells were incubated with increasing concentrations (0 to 200  $\mu\text{g/ml}$ ) of wild type, Fc variants (S239D/I332E, S239D/I332E/G236A or non-fucosylated), or control antibody, and stained with  $\text{F(ab')}_2$  fragments of polyclonal FITC-conjugated rabbit anti-human IgG. Each data point represents the relative fluorescence intensity (RFI) of the respective antibody at the indicated concentration.
